# Supplementary material for: Cu-induced NiCu-P and NiCu-Pi with multilayered nanostructures as highly efficient electrodes for hydrogen production via urea electrolysis
Source: Royal Society of Chemistry journal article supplement (doi:10.1039/d2nr04409a), 2022-01-01
Supplement: d2nr04409a1.pdf [file d2nr04409a1.pdf]

## Supplementary Material

# **Cu-induced NiCu-P and NiCu-Pi with Multilayered Nanostructures as Highly Efficient Electrodes for Hydrogen Production via Urea Electrolysis**

Xiao Xu,<sup>1</sup> Shan Ji,<sup>2\*</sup> Hui Wang,<sup>1</sup> Xuyun Wang,<sup>1\*\*</sup> Vladimir Linkov,<sup>3</sup> Peng  
Wang,<sup>4</sup> Lei Pan,<sup>4</sup> Guoqiang Wang,<sup>4</sup> Rongfang Wang<sup>1\*\*\*</sup>

<sup>1</sup> State Key Laboratory Base for Eco-Chemical Engineering, College of Chemical  
Engineering, Qingdao University of Science and Technology, Qingdao, 266042,  
China

<sup>2</sup> College of Biological, Chemical Science and Engineering, Jiaxing University, Jiaxing,  
314001, China

<sup>3</sup> South African Institute for Advanced Materials Chemistry, University of the Western  
Cape, Cape Town, 7535, South Africa

<sup>4</sup> Shandong Hydrogen Energy Co., Ltd, Weifang, 261000, China

---

## Physical characterization

X-ray diffraction (XRD) was carried out on a Shimadzu XD-3A Instrument, which was fitted with a Cu-K $\alpha$  radiation filter ( $\lambda = 0.15418$  nm) and operated at 30 mA and 40 kV. A JEM-2000 FX JEOL microscope operated at 200 kV was used for recording transmission electron microscopy (TEM) and high angle annular dark-field scanning transmission electron microscopy (STEM) images as well as selected area electron diffraction (SAED) analysis. X-ray photoelectron spectra (XPS) were obtained on a VG Escalab210 Spectrometer with a Mg 300 W X-ray source. The reference value chosen for correcting the instrumental aberrations was depended on the binding energy of C 1s, which was 284.8 eV, and the number of scans for examined was 0.1 eV.

## Electrochemical characterization

A three-electrode electrochemical cell linked with a potentiostat/galvanostat (CHI 760, CH Instruments) was applied to evaluate the HER, UOR and OER electrocatalytic properties. In this three-electrode cell, Hg/HgO and graphite rod were used as reference electrode (RE) and counter electrode (CE) respectively. For comparison, Pt/C and RuO<sub>2</sub> electrodes were also prepared by dispersing 16 mg the catalyst, 2  $\mu$ L of polymer binder PTFE, 2 mg acetylene black in 300  $\mu$ L isopropyl alcohol to form a homogenous slurry. After rolling into a slice and oven drying at 60°C, the mixture was pressed onto the 1 cm  $\times$  1 cm Ni foam under 20 MPa. 1.0 M KOH aqueous solution and 1.0 M KOH with 0.33 M urea aqueous solution were used as electrolyte for electrocatalytic testing. For convenience, the measured potential versus the reversible electrode (RHE) were converted according to the equation:

---

$$E_{\text{RHE}} = E_{\text{Hg/HgO}} + 0.059 \text{ pH} + 0.098 \quad (1)$$

Linear sweep voltammetry (LSV) were measured at a scan rate of  $5 \text{ mV s}^{-1}$ . The LSV curves were corrected for  $iR$  compensation (80%). Electrochemical impedance spectroscopy (EIS) spectra were measured at corresponding UOR and HER electrode potentials from 0.01 to 1,000,000 Hz with an amplitude of 5 mV. Moreover, a Nafion membrane was used for blocking bubble diffusion during the gas collection process by a classical drainage method in the three-electrode mode. The electrochemical surface area (ECSA) of the materials was derived from the double-layer capacitance ( $C_{\text{dl}}$ ), which was measured by cyclic voltammetry (CV) in non-Faradaic regions under potentials ranging from -0.8 V to -0.7 V and from -0.1 V to -0 V vs Hg/HgO at scan rates from  $20 \text{ mV s}^{-1}$  to  $120 \text{ mV s}^{-1}$ . Currents at -0.75 V and -0.05 V were used to calculate  $C_{\text{dl}}$  and ECSA according to the following equations:

$$j = v \cdot C_{\text{dl}} \quad (2)$$

$$\text{ECSA} = C_{\text{dl}} / (C_s \times S) \quad (3)$$

Where  $j$  is the double-layer charging current density,  $v$  is the scan rate,  $C_s$  represents the specific electrode surface capacitance ( $\mu\text{F cm}^{-2}$ ) and  $S$  is the working electrode area ( $\text{cm}^2$ ). The value of  $C_s$  in an alkaline media was accepted to be  $40 \mu\text{F cm}^{-2}$ .

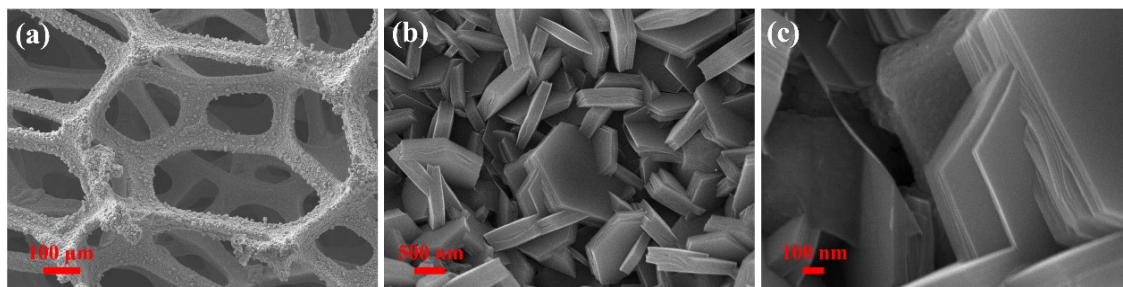

**Figure S1.** SEM images of NiCu-OH/NF-0.3.

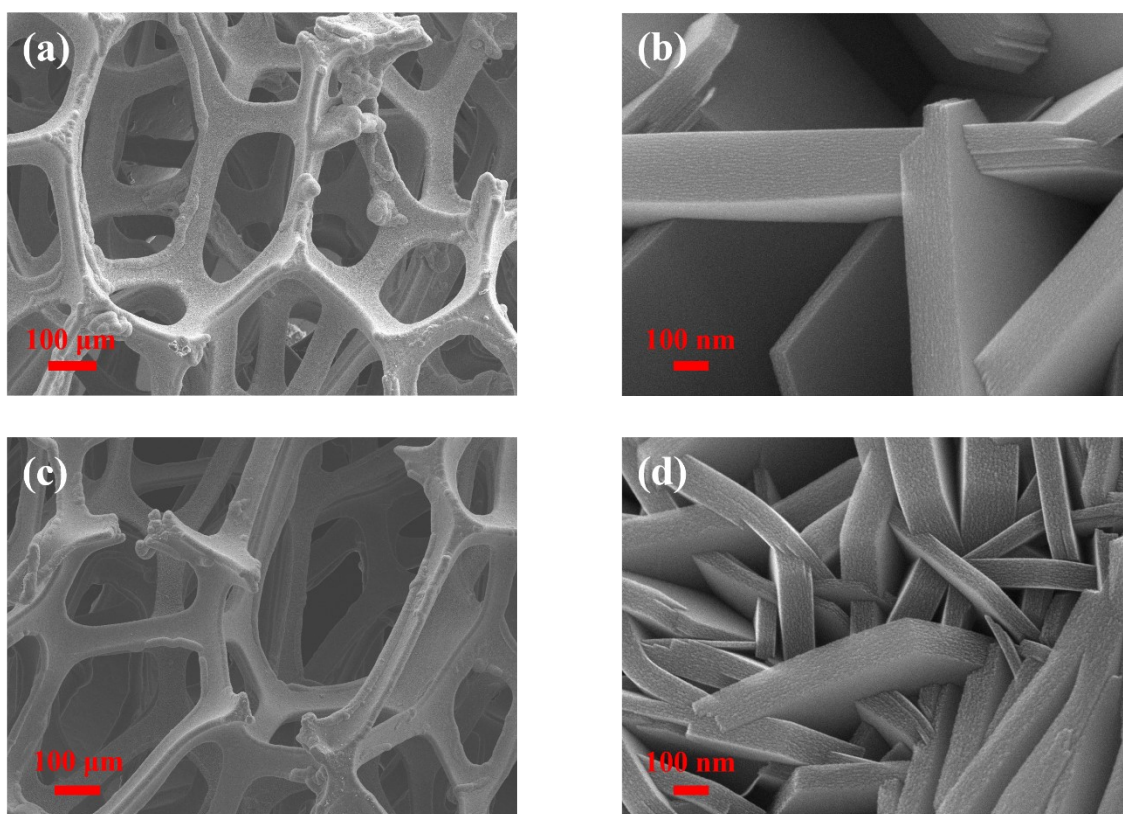

**Figure S2.** SEM images of Ni<sub>2</sub>P/NF (a-b) and Ni-Pi/NF (c-d).

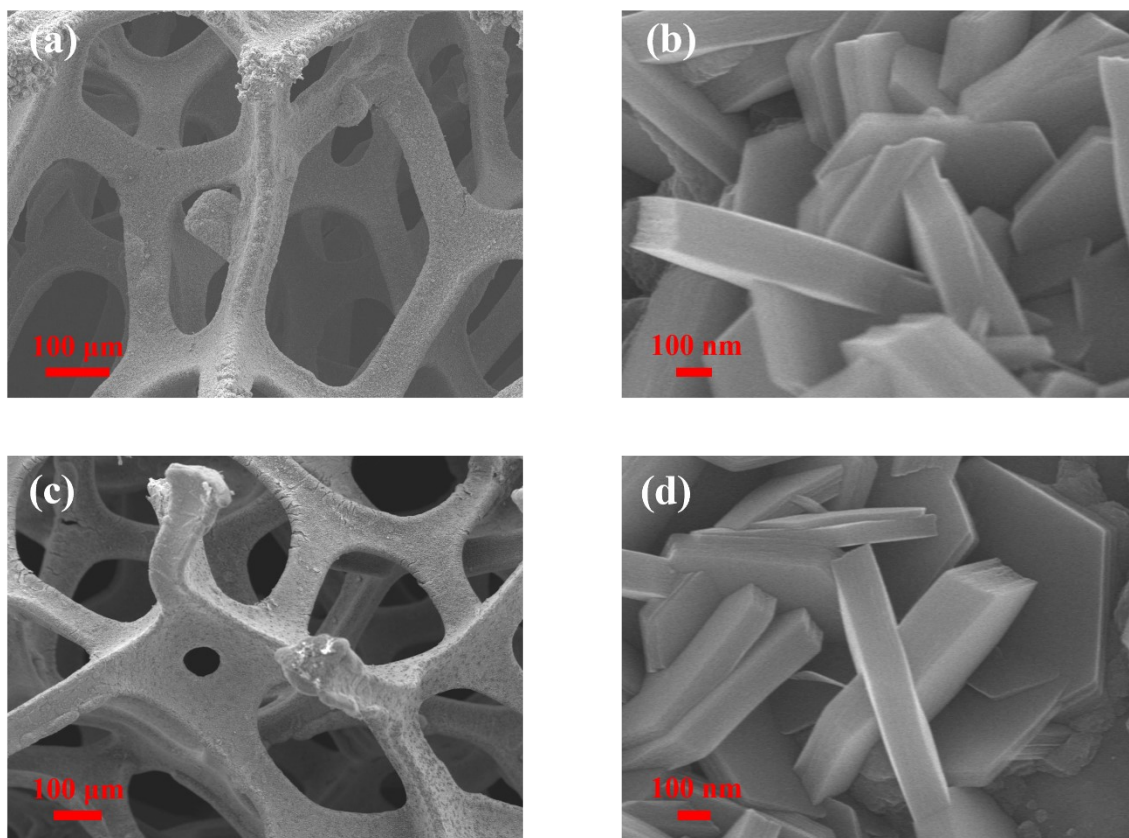

**Figure S3.** SEM images of NiCu-P/NF-0.1 (a-b) and NiCu-Pi/NF-0.1 (c-d).

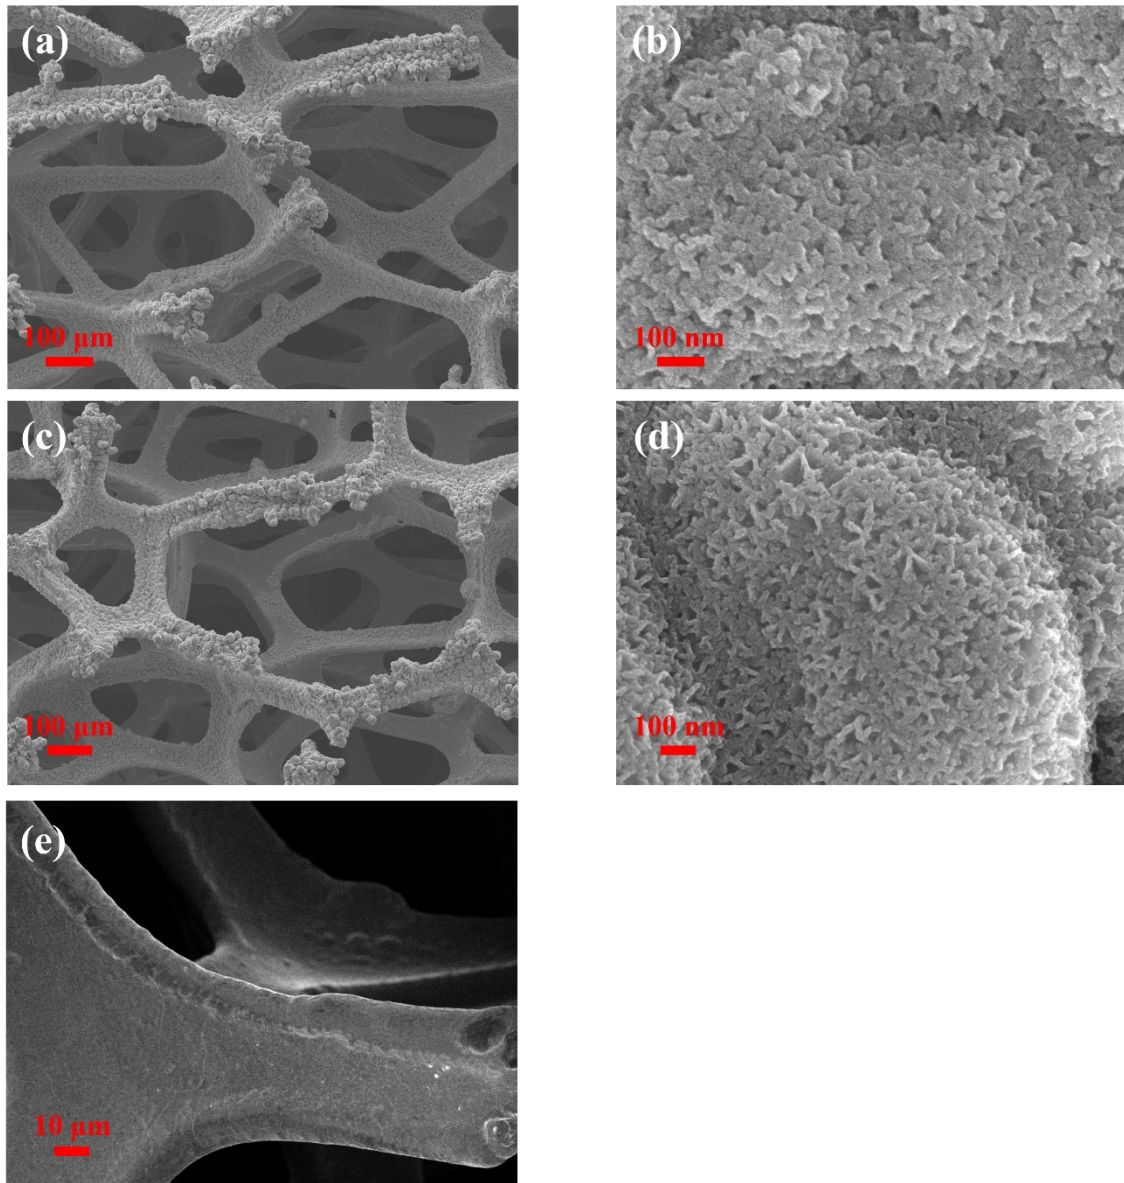

**Figure S4.** SEM images of NiCu-P/NF-0.5 (a-b); NiCu-Pi/NF-0.5 (c-d) and NF (e).

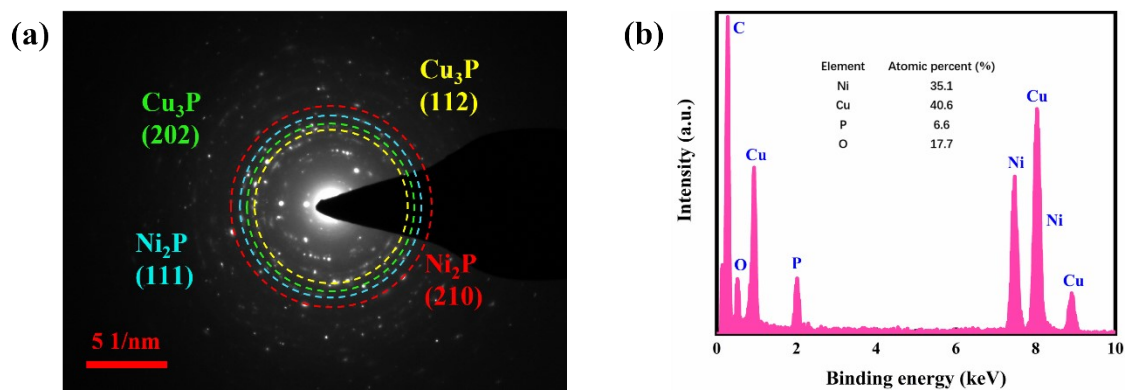

**Figure S5.** SEAD image (a) and EDX result (b) of NiCu-P/NF-0.3.

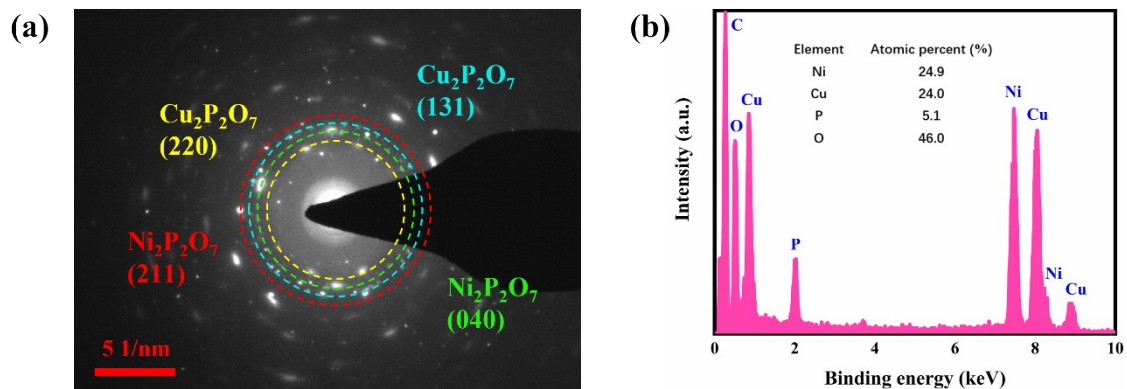

**Figure S6.** SEAD image (a) and EDX result (b) of NiCu-Pi/NF-0.3.

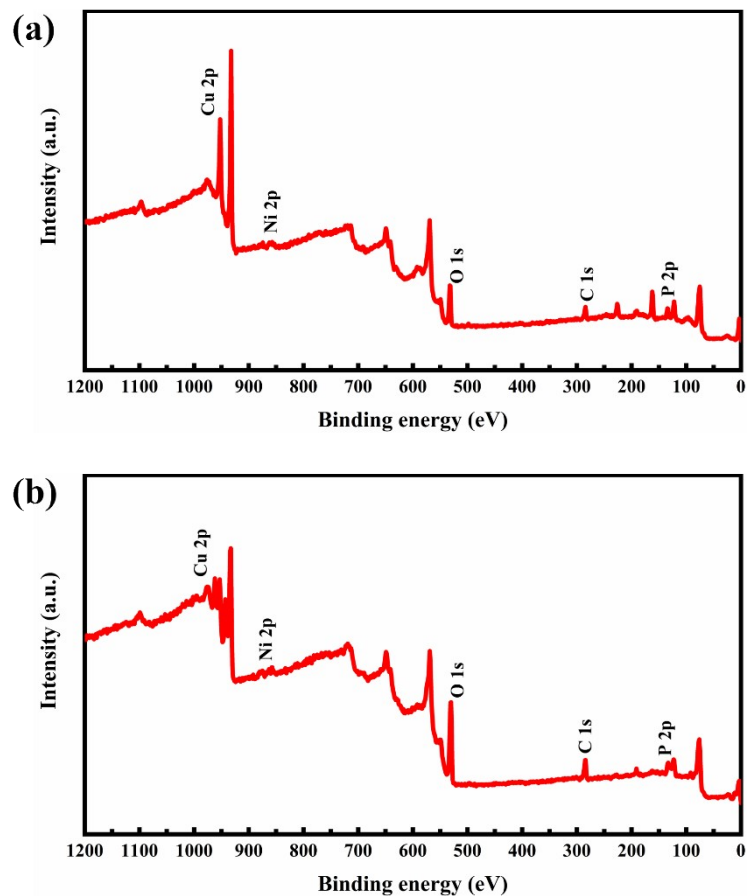

**Figure S7.** Survey XPS spectra of NiCu-P/NF-0.3 (a) and NiCu-Pi/NF-0.3 (b).

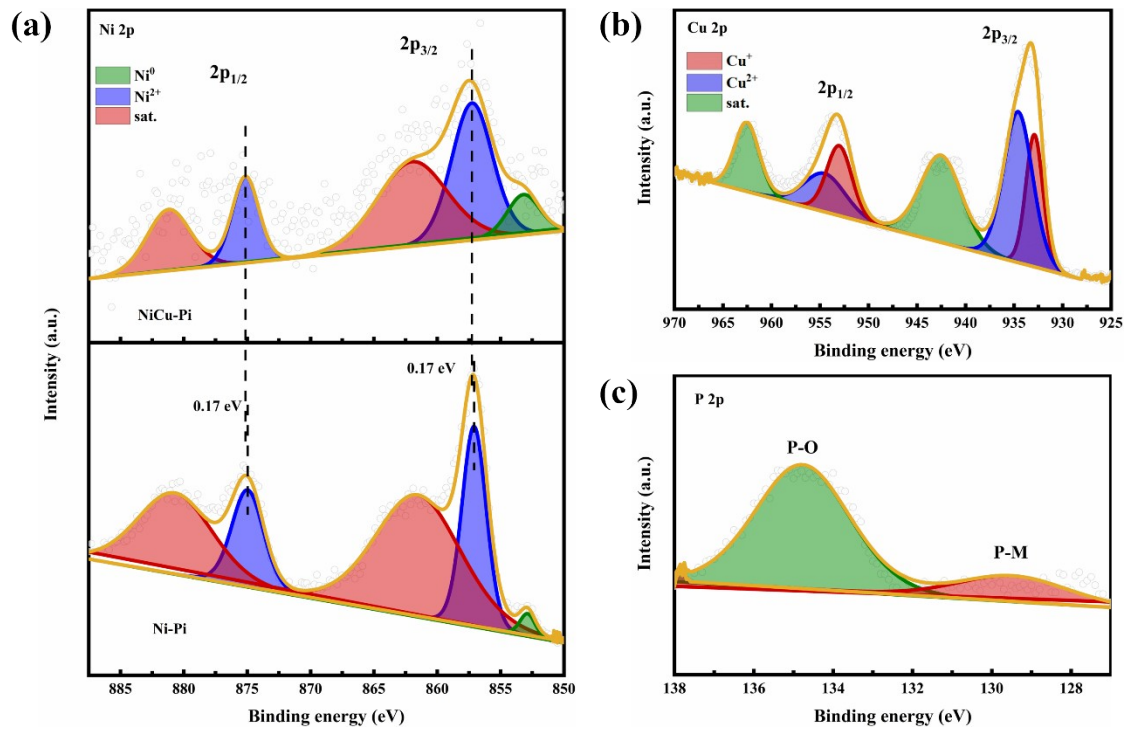

**Figure S8.** Ni 2p XPS of NiCu-Pi/NF-0.3 and Ni-Pi/NF (a); Cu 2p XPS (b) and P 2p XPS (c) of NiCu-Pi/NF-0.3.



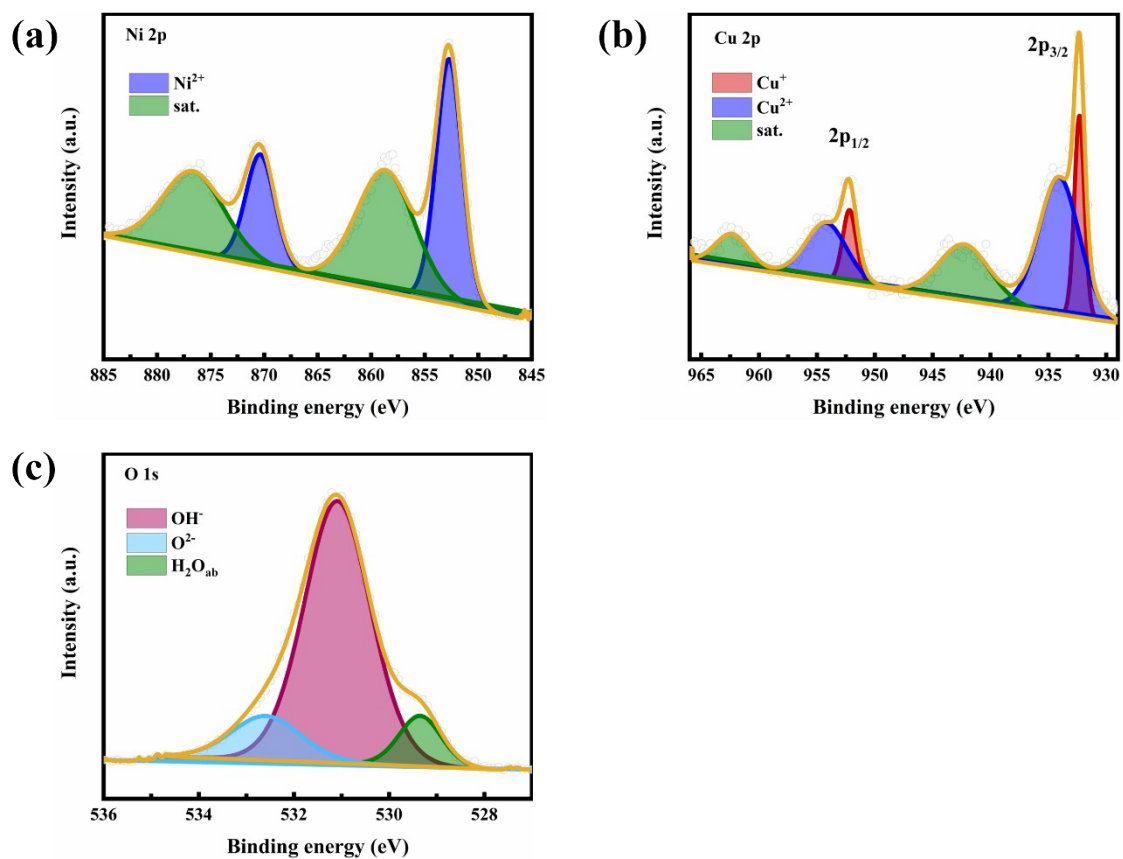

**Figure S9.** Ni 2p XPS (a), Cu 2p XPS (b) and P 2p XPS (c) of NiCu-OH/NF-0.3.

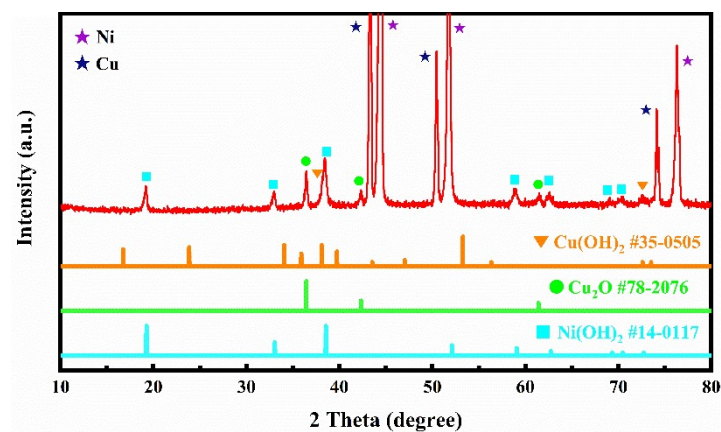

**Figure S10.** XRD pattern of NiCu-OH/NF-0.3

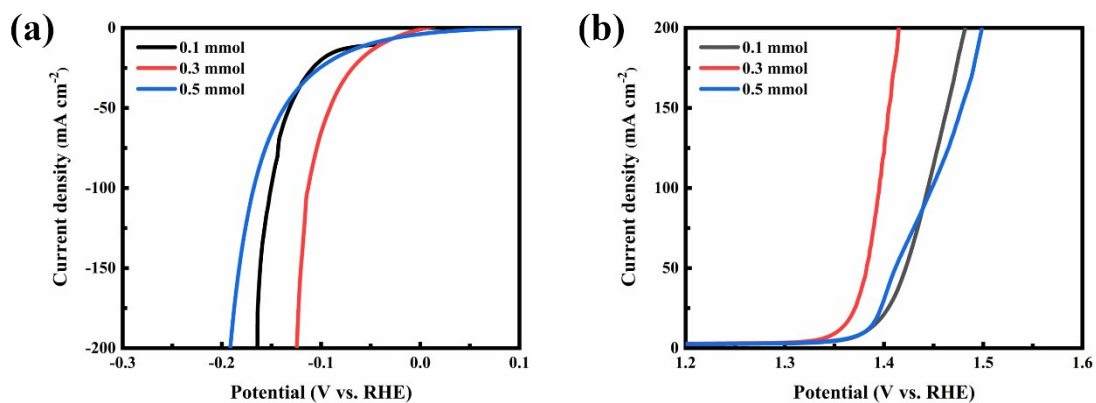

**Figure S11.** HER LSVs of NiCu-P/NF-0.1, NiCu-P/NF-0.3 and NiCu-P/NF-0.5 (a) and UOR LSVs of NiCu-Pi/NF-0.1, NiCu-Pi/NF-0.3 and NiCu-Pi/NF-0.5 (b).

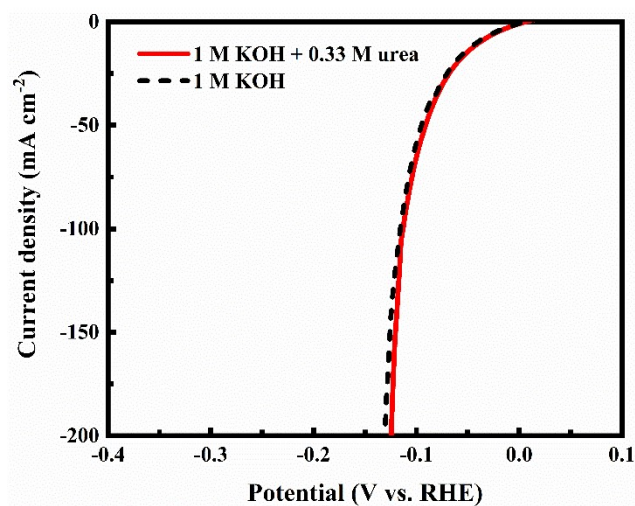

**Figure S12.** HER LSV in 1 M KOH with 0.33 M urea and 1 M KOH of NiCu-P/NF.

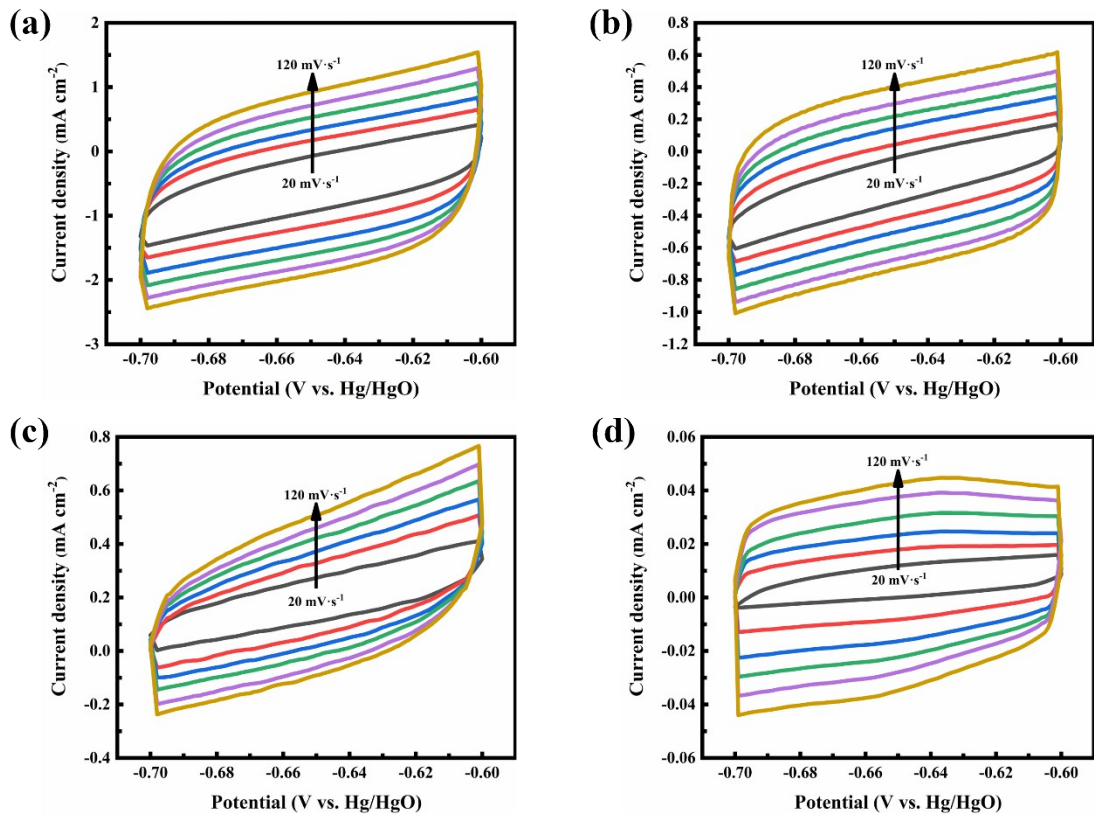

**Figure S13.** Cyclic Voltammetry plots at different scan rates (20 mV/s to 120 mV/s) of NiCu-P/NF (a), NiCu-OH/NF (b), Ni<sub>2</sub>P/NF (c) and NF (d) for HER.

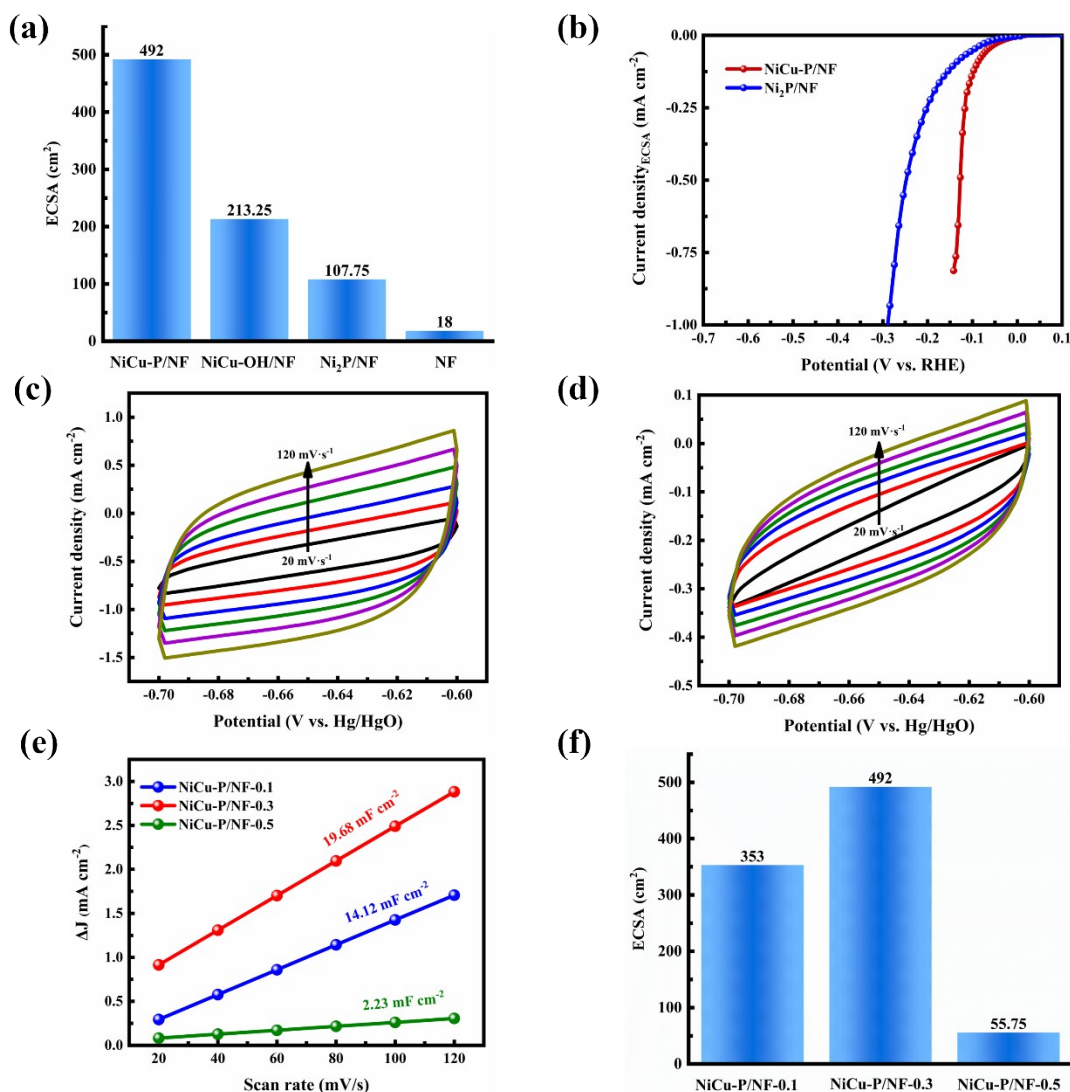

**Figure S14.** ECSA of NiCu-P/NF, NiCu-OH/NF, Ni<sub>2</sub>P/NF and NF for HER (a) and ECSA normalized LSVs of HER (b); Cyclic Voltammetry plots at different scan rates (20 mV/s to 120 mV/s) of NiCu-P/NF-0.1 (c) and NiCu-P/NF-0.5 (d); ECSA of NiCu-P/NF-0.1, NiCu-P/NF-0.3 and NiCu-P/NF-0.5 for HER (e) and ECSA normalized LSVs of HER (f).

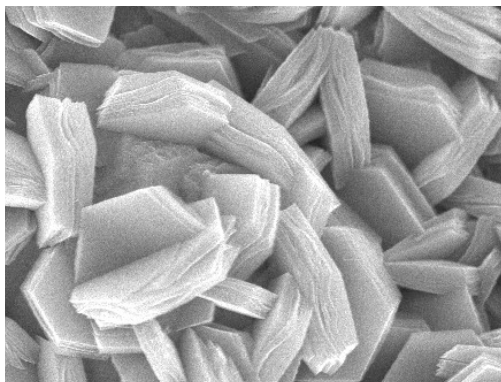

**Figure S15.** SEM image of NiCu-P/NF after HER stability testing.

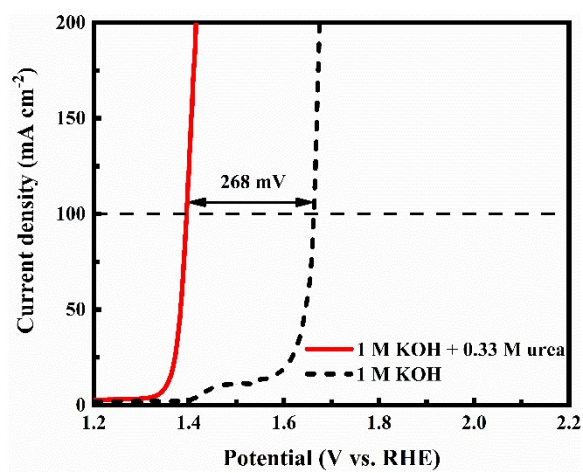

**Figure S16.** UOR LSV and OER LSV in 1 M KOH with 0.33 M urea and 1 M KOH of NiCu-Pi/NF.

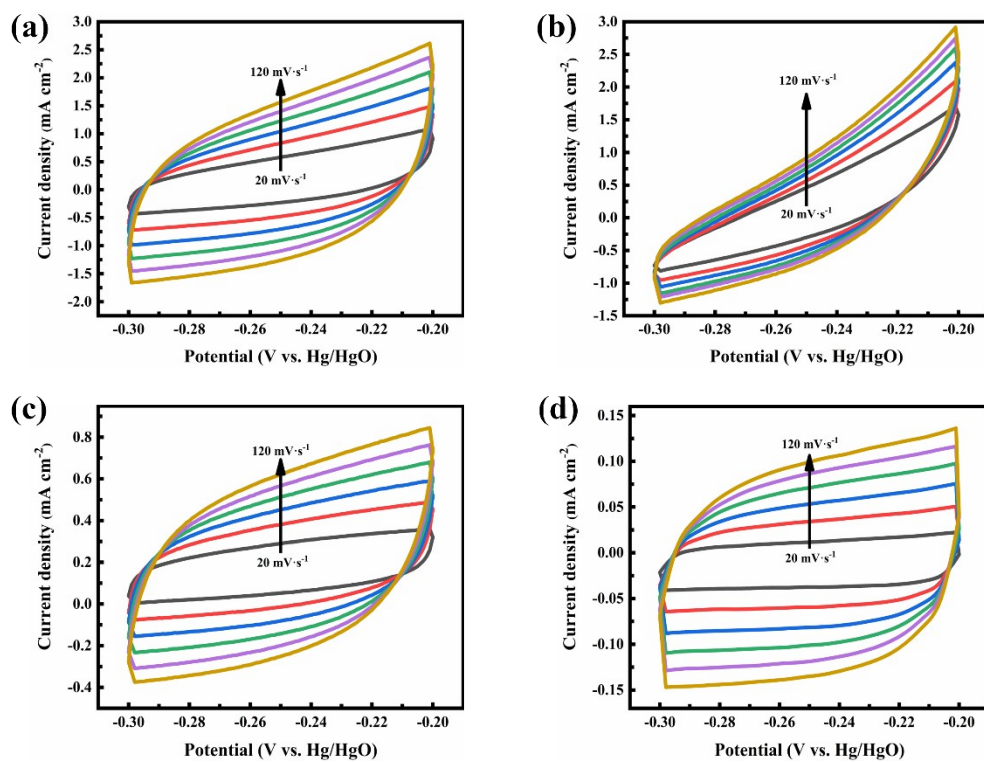

**Figure S17.** Cyclic Voltammetry plots at different scan rates (20 mV/s to 120 mV/s) of NiCu-Pi/NF (a), NiCu-OH/NF (b), Ni-Pi/NF (c) and NF (d) for UOR.

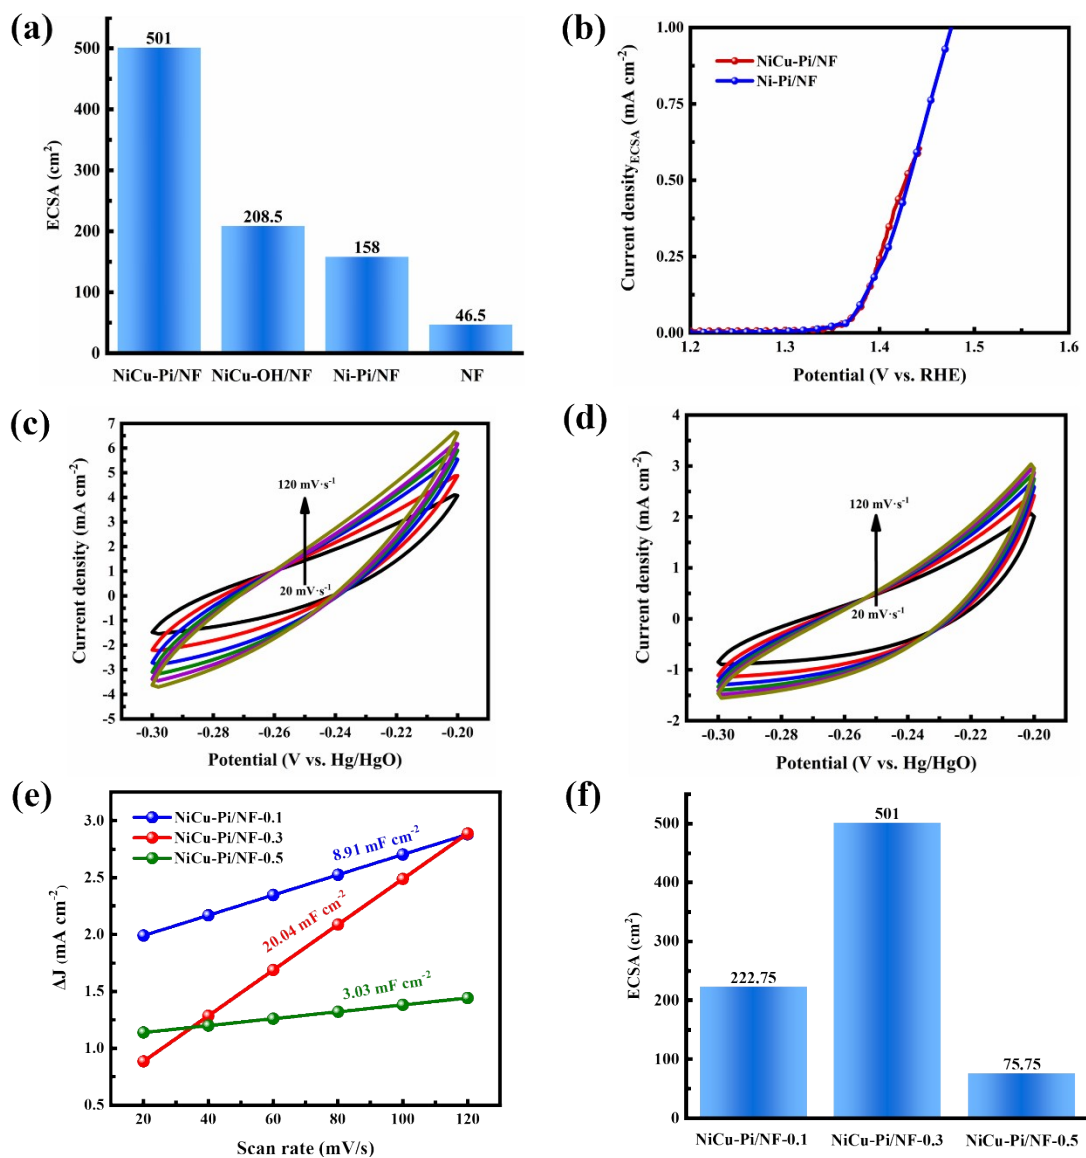

**Figure S18.** ECSA of NiCu-Pi/NF, NiCu-OH/NF, Ni-Pi/NF and NF for HER (a) and ECSA normalized LSVs of UOR.

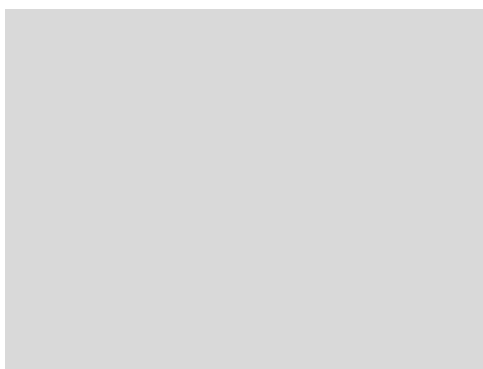

**Figure S19.** SEM image of NiCu-Pi/NF after UOR stability testing.

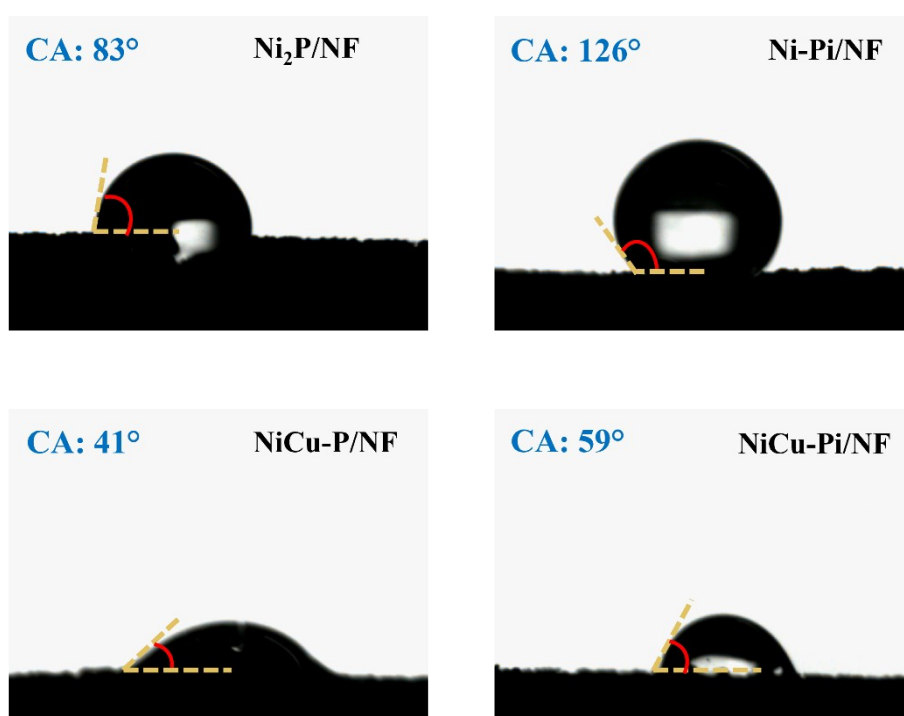

**Figure S20.** The contact angle images.



**Table S1.** ICP analysis data of metals in the as-prepared catalysts with different Cu dosages.

| Materials     | Loading amount (mg kg) |          | Atomic percentage |          |
|---------------|------------------------|----------|-------------------|----------|
|               | Ni                     | Cu       | Ni                | Cu       |
| NiCu-P/NF-0.1 | 960886.2               | 31539.8  | 96.0886%          | 3.1540%  |
| NiCu-P/NF-0.3 | 922250.5               | 73771.8  | 92.2251%          | 7.3772%  |
| NiCu-P/NF-0.5 | 847836.7               | 139726.9 | 84.7837%          | 13.9727% |

**Table S2.** The relative peak area of the orbital peaks.

| Element | Materials  | Relative peak area                      |                                        |                                         |                                        |
|---------|------------|-----------------------------------------|----------------------------------------|-----------------------------------------|----------------------------------------|
| Ni      | NiCu-P/NF  | 2p <sub>1/2</sub> Ni <sup>2+</sup> -62% | 2p <sub>1/2</sub> Ni <sup>0</sup> -38% | 2p <sub>3/2</sub> Ni <sup>2+</sup> -62% | 2p <sub>3/2</sub> Ni <sup>0</sup> -38% |
|         | NiCu-Pi/NF | /                                       |                                        | 2p <sub>3/2</sub> Ni <sup>2+</sup> -81% | 2p <sub>3/2</sub> Ni <sup>0</sup> -19% |
|         | NiCu-OH/NF | /                                       |                                        |                                         |                                        |
| Cu      | NiCu-P/NF  | 2p <sub>1/2</sub> Cu <sup>2+</sup> -54% | 2p <sub>1/2</sub> Cu <sup>+</sup> -46% | 2p <sub>3/2</sub> Cu <sup>2+</sup> -31% | 2p <sub>3/2</sub> Cu <sup>+</sup> -69% |
|         | NiCu-Pi/NF | 2p <sub>1/2</sub> Cu <sup>2+</sup> -53% | 2p <sub>1/2</sub> Cu <sup>+</sup> -47% | 2p <sub>3/2</sub> Cu <sup>2+</sup> -66% | 2p <sub>3/2</sub> Cu <sup>+</sup> -34% |
|         | NiCu-OH/NF | 2p <sub>1/2</sub> Cu <sup>2+</sup> -70% | 2p <sub>1/2</sub> Cu <sup>+</sup> -30% | 2p <sub>3/2</sub> Cu <sup>2+</sup> -73% | 2p <sub>3/2</sub> Cu <sup>+</sup> -27% |
| P       | NiCu-P/NF  | P-M -18%                                |                                        | P-O -82%                                |                                        |
|         | NiCu-Pi/NF | P-M -15%                                |                                        | P-O -85%                                |                                        |
| O       | NiCu-OH/NF | OH <sup>-</sup> -80%                    | O <sup>2-</sup> -13%                   |                                         | H <sub>2</sub> O <sub>ab</sub> -7%     |

**Table S3.** EIS resistance ( $\Omega$ ) fitting values.

| Materials            | UOR   |          | HER   |          |
|----------------------|-------|----------|-------|----------|
|                      | $R_s$ | $R_{ct}$ | $R_s$ | $R_{ct}$ |
| NF                   | 0.98  | 47.24    | 0.85  | 49.51    |
| NiCu-OH/NF           | 0.70  | 24.81    | 0.99  | 16.65    |
| Ni <sub>2</sub> P/NF | /     |          | 1.04  | 18.81    |
| NiCu-P/NF            | /     |          | 0.72  | 5.79     |
| Ni-Pi/NF             | 1.08  | 8.98     | /     |          |
| NiCu-Pi/NF           | 0.63  | 5.95     | /     |          |

**Table S4.** Conductivity and square resistance of different materials.

| Materials            | Square resistance ( $m\Omega \cdot mm$ ) | Conductivity (KS/mm) |
|----------------------|------------------------------------------|----------------------|
| NF                   | 2.87                                     | 0.35                 |
| NiCu-OH/NF           | 2.33                                     | 0.43                 |
| Ni <sub>2</sub> P/NF | 1.92                                     | 0.52                 |
| NiCu-P/NF            | 1.64                                     | 0.61                 |
| Ni-Pi/NF             | 2.12                                     | 0.47                 |
| NiCu-Pi/NF           | 1.78                                     | 0.56                 |

**Table S5.** Cell voltage of different Ni-based electrodes found in recently reported literature.

| Electrode                                 | Morphology           | Electrolyte            | Cell voltage (V)                 | Ref.      |
|-------------------------------------------|----------------------|------------------------|----------------------------------|-----------|
| NiCu-P/NF<br>and NiCu-Pi/NF               | Multilayer Structure | 1 M KOH+0.33<br>M Urea | 1.410 (10 mA cm <sup>-2</sup> )  | This work |
|                                           |                      |                        | 1.514 (50 mA cm <sup>-2</sup> )  |           |
|                                           |                      |                        | 1.568 (100 mA cm <sup>-2</sup> ) |           |
| NiCoB@C                                   | Alloy                | 1 M KOH+0.33<br>M Urea | 1.62 (100 mA cm <sup>-2</sup> )  | 1         |
| Ni(OH) <sub>2</sub> @NF                   | Core-shell           | 1 M KOH+0.3 M<br>Urea  | 1.45 (50 mA cm <sup>-2</sup> )   | 2         |
| Co-Ni(OH) <sub>2</sub> /NF                | Nanoparticle         | 1 M KOH+0.5 M<br>Urea  | 1.63 (50 mA cm <sup>-2</sup> )   | 3         |
| Ni-Co <sub>9</sub> S <sub>8</sub> /CC     | Nanosheet            | 1 M KOH+0.33<br>M Urea | 1.52 (10 mA cm <sup>-2</sup> )   | 4         |
| Ni <sub>2</sub> P/Ni <sub>0.96</sub> S/NF | Microsphere          | 1 M KOH+0.5 M<br>Urea  | 1.453 (10 mA cm <sup>-2</sup> )  | 5         |
| Ni <sub>3</sub> N/NF                      | Nanosheet            | 1 M KOH+0.5 M<br>Urea  | 1.51 (100 mA cm <sup>-2</sup> )  | 6         |
| NiF <sub>3</sub> /Ni <sub>2</sub> P@CC    | Nanoparticle         | 1 M KOH+0.33<br>M Urea | 1.54 (10 mA cm <sup>-2</sup> )   | 7         |
| V-FeNi <sub>3</sub> N/Ni <sub>3</sub> N   | Nanosheet            | 1 M KOH+0.33<br>M Urea | 1.46 (10 mA cm <sup>-2</sup> )   | 8         |
| NF/PPy-Ni <sub>3</sub> S <sub>2</sub>     | Nanowire             | 1 M KOH+0.33<br>M Urea | 1.5 (20 mA cm <sup>-2</sup> )    | 9         |
| NiS/MoS <sub>2</sub> /NF                  | Nanosheet            | 1 M KOH+0.5 M<br>Urea  | 1.48 (10 mA cm <sup>-2</sup> )   | 10        |
| S-Co <sub>2</sub> P@Ni <sub>2</sub> P     | Core-shell           | \                      | 1.43 (10 mA cm <sup>-2</sup> )   | 11        |
| NiO/Ni <sub>2</sub> P/NF                  | Nanosheet            | 1 M KOH+0.33<br>M Urea | 1.559 (50 mA cm <sup>-2</sup> )  | 12        |
| Ni <sub>3</sub> S <sub>2</sub> -NiS/NF    | Nanorod              | 1 M KOH+0.5 M<br>Urea  | 1.54 (50 mA cm <sup>-2</sup> )   | 13        |
| NiFeMo/NF                                 | Film                 | 1 M KOH+0.33<br>M Urea | 1.46 (10 mA cm <sup>-2</sup> )   | 14        |
| NiMoSe/NF                                 | Nanosphere           | 1 M KOH+0.33<br>M Urea | 1.44 (10 mA cm <sup>-2</sup> )   | 15        |

---

## References

1. B. Kim, G. Das, J. Kim, H. H. Yoon and D. H. Lee, *J. Colloid Interface Sci.*, 2021, **601**, 317-325.
2. L. Xia, Y. Liao, Y. Qing, H. Xu, Z. Gao, W. Li and Y. Wu, *ACS Appl. Energ. Mater.*, 2020, **3**, 2996-3004.
3. C. B. Sun, M. W. Guo, S. S. Siwal and Q. B. Zhang, *J. Catal.*, 2020, **381**, 454-461.
4. P. Hao, W. Zhu, L. Li, J. Tian, J. Xie, F. Lei, G. Cui, Y. Zhang and B. Tang, *Electrochim. Acta*, 2020, **338**, 135883.
5. M. He, C. Feng, T. Liao, S. Hu, H. Wu and Z. Sun, *ACS Appl. Mater. Interfaces*, 2020, **12**, 2225-2233.
6. Z. Zhao, J. Zhao, H. Wang, X. Li, L. Yang, Z. Zhao, X. Liu, Y. Liu, P. Liu and Z. Cai, *Int. J. Hydrogen Energ.*, 2020, **45**, 14199-14207.
7. K. Wang, W. Huang, Q. Cao, Y. Zhao, X. Sun, R. Ding, W. Lin, E. Liu and P. Gao, *Chem. Eng. J.*, 2022, **427**, 130865.
8. J. Wang, Y. Sun, Y. Qi and C. Wang, *ACS Appl. Mater. Interfaces*, 2021, **13**, 57392-57402.
9. Y. Zhang, Y. Qiu, Y. Wang, B. Li, Y. Zhang, Z. Ma and S. Liu, *ACS Appl. Mater. Interfaces*, 2021, **13**, 3937-3948.
10. C. Gu, G. Zhou, J. Yang, H. Pang, M. Zhang, Q. Zhao, X. Gu, S. Tian, J. Zhang, L. Xu and Y. Tang, *Chem. Eng. J.*, 2022, **443**, 136321.
11. W. Yuan, T. Jiang, X. Fang, Y. Fan, S. Qian, Y. Gao, N. Cheng, H. Xue and J. Tian, *Chem. Eng. J.*, 2022, **439**, 135743.
12. X. Xu, S. Ji, H. Wang, X. Wang, V. Linkov and R. Wang, *J. Colloid Interface Sci.*, 2022, **615**, 163-172.
13. Q. Zhao, C. Meng, D. Kong, Y. Wang, H. Hu, X. Chen, Y. Han, X. Chen, Y. Zhou, M. Lin and M. Wu, *ACS Sustain. Chem. Eng.*, 2021, **9**, 15582-15590.
14. Z. Lv, Z. Li, X. Tan, Z. Li, R. Wang, M. Wen, X. Liu, G. Wang, G. Xie and L. Jiang, *Appl. Surf. Sci.*, 2021, **552**, 149514.
15. H. Wang, X. Jiao, W. Zeng, Y. Zhang and Y. Jiao, *Int. J. Hydrogen Energ.*, 2021, **46**, 37792-37801.
